# Supplementary material for: The complex SNP and CNV genetic architecture of the increased risk of congenital heart defects in Down syndrome
Source: HighWire-hosted journal article supplement (doi:10.1101/gr.147991.112), 2013-06-19
Supplement: Supp_Legends_Tables.docx [file Supp_Legends_Tables.docx]

**Figure S1**. *Q-Q* plots of the SNP association test statistic for CHD and its different sub-phenotypes. **A)** For DS-CHD, B**)** for DS-AVSD, **C)** for DS-VSD, and **D)** for DS-ASD. The lower horizontal red line represents the 90 th percentile, while the upper one indicates the observed values lifting off the expected.

**Figure S2**.*Q-Q* plot of whole-genome *cis*-eQTLs interaction study *P-*values.

**Figure S3**. Presence of CNV1 in healthy population (GenCord cohort) and Down syndrome individuals shown by Illumine SNP Probe. SNP probe intensity (R) is plotted against Theta value for rs12482855 located outside of the CNV1 and rs13048349 located inside the CNV1 in **A)** and **B)** normal individuals from GenCord cohort and **C)** and **D)** in Down syndrome individuals. Probes for the SNP inside CNV1 clearly aggregate into four clusters in normal individuals and five clusters in Down syndrome individuals. Probes for the nearest SNP outside of the CNV1 form three and four clusters in normal and Down syndrome individuals respectively.

**Figure S4**.Dosage copy number obtained by the GMM model is plotted against qPCR log2 ratios for **A)** Control region (chr21:41,125,388-41,125,571), **B)** CNV1 (chr21:42,068,711-42,068,995), **C)** CNV2 (chr21:42,284,480-42,284,663), and D) CNV3 (chr21:45,543,908-45,544,146). The copy number states are shown on the top of each plot.

**Figure S5**. Box-plots of gene expression values (RPKM) and copy number states based on one-sided Mann-Whitney *U*-test. GenCord individuals were divided in two groups based on two or three copy number states for each CNV and RPKM was calculated for each gene of interest. For all the box-plots the width of box is proportional to the amount of data within that group.

**Figure S6**.Chromosome 21 SNPs calling. We discriminated 4 clusters representing the genotypes AAA, AAB, ABB, and BBB by plotting probe intensity (R) versus allele ratio (theta) for each individual. Similar plots have been prepared for all the DS samples.

**Figure S7**. **A)** Multi dimensional scaling (MDS) plot (Components 1 and 2) for the DS with and without CHD and comparison with other samples including GenCord dataset (see Dimas et al, 2009), and Hapmap phase2 samples (CHB/JPT and YRI) (http://hapmap.ncbi.nlm.nih.gov/) **B)** Individual loadings on principal components 1 and 2 (PC1, PC2) for EIGENSTRAT analysis for the DS with and without CHD and comparison with other samples including Hapmap phase2 samples (CHB/JPT and YRI). **C)** PC1 and PC2 for EIGENSTRAT analysis for the DS with and without CHD, without out groups. **D)** *Q-Q* plot of *P*-values of all DS individuals with CHD versus DS individuals without CHD. Genomic inflation factor calculated by EIGENSTRAT is 1.01 and by PLINK is 1.02.

**Figure S8.** Array CGH result using a 44K Agilent CGH array illustrating the trisomic state for the entire long arm of chromosome 21 in the lymphoblastoid cell line derived from a DS individual without CHD. The DNA from this cell line is used as the reference DNA in the chromosome 21 CNV experiment.

**Figure S9.** Box- plots of all 135,679 CNV probes log**2** ratios per sample **A)** before and **B)** after quantile normalization.

**Table S1.** Top SNP association results for DS-CHD and its sub-phenotypes.

|  | ***Chr.*** | **SNP** | ***P-value*** | ***Bonf.*** | ***FDR*** | ***OR*** |
| --- | --- | --- | --- | --- | --- | --- |
| **DS-CHD** | 6 | rs2983865 | 2.43E-06 | 1 | 0.3424 | 0.4729 |
|  | 18 | rs1968470 | 3.05E-06 | 1 | 0.3424 | 2.099 |
|  | 18 | rs2852749 | 3.37E-06 | 1 | 0.3424 | 0.3576 |
|  | 14 | rs11621241 | 3.49E-06 | 1 | 0.3424 | 3.997 |
|  | 6 | rs2983879 | 3.96E-06 | 1 | 0.3424 | 0.4824 |
|  | 14 | rs17119691 | 5.24E-06 | 1 | 0.3703 | 3.915 |
|  | 7 | rs1354615 | 6.00E-06 | 1 | 0.3703 | 2.043 |
|  | 6 | rs2875129 | 1.09E-05 | 1 | 0.4973 | 1.991 |
|  | 16 | rs9928573 | 1.26E-05 | 1 | 0.4973 | 2.107 |
| **DS-AVSD** |  | |  |  |  |  |
|  | 7 | rs1568214 | 1.72E-06 | 0.7439 | 0.3028 | 2.693 |
|  | 6 | rs2983865 | 2.08E-06 | 0.898 | 0.3028 | 0.3508 |
|  | 7 | rs7778237 | 2.43E-06 | 1 | 0.3028 | 2.653 |
|  | 6 | rs3011868 | 2.80E-06 | 1 | 0.3028 | 2.666 |
|  | 6 | rs2983879 | 5.06E-06 | 1 | 0.3351 | 0.3711 |
|  | 6 | rs2917461 | 5.26E-06 | 1 | 0.3351 | 2.594 |
|  | 3 | rs13084784 | 5.63E-06 | 1 | 0.3351 | 2.623 |
|  | 6 | rs2983882 | 6.21E-06 | 1 | 0.3351 | 2.554 |
|  | 7 | rs6946669 | 1.24E-05 | 1 | 0.4598 | 2.472 |
|  | 7 | rs7799573 | 1.24E-05 | 1 | 0.4598 | 2.472 |
| **DS-ASD** |  |  |  |  |  |  |
|  | 5 | rs160890 | 7.83E-08 | 0.03383 | 0.03383 | 8.632 |
|  | 2 | rs779355 | 1.40E-06 | 0.6054 | 0.3027 | 3.076 |
|  | 9 | rs7033354 | 5.26E-06 | 1 | 0.7121 | 0.2865 |
|  | 1 | rs11102433 | 8.34E-06 | 1 | 0.7121 | 3.157 |
|  | 2 | rs930655 | 8.86E-06 | 1 | 0.7121 | 0.3418 |
|  | 15 | rs1672460 | 9.89E-06 | 1 | 0.7121 | 3.831 |
|  | 7 | rs7789571 | 1.28E-05 | 1 | 0.7551 | 4.95 |
|  | 15 | rs1704394 | 1.40E-05 | 1 | 0.7551 | 3.135 |
|  | 16 | rs7498941 | 2.23E-05 | 1 | 0.8094 | 3.353 |
|  | 3 | rs9850770 | 2.24E-05 | 1 | 0.8094 | 3.082 |
| **DS-VSD** |  |  |  |  |  |  |
|  | 10 | rs1949058 | 1.32E-07 | 0.05703 | 0.03957 | 1.284 |
|  | 10 | rs10788451 | 1.83E-07 | 0.07913 | 0.03957 | 0.5663 |
|  | 12 | rs1847461 | 4.81E-07 | 0.2078 | 0.06925 | 1.153 |
|  | 14 | rs17119691 | 1.04E-06 | 0.4491 | 0.08982 | 0.927 |
|  | 14 | rs11621241 | 1.04E-06 | 0.4491 | 0.08982 | 1.038 |
|  | 12 | rs10859032 | 1.40E-06 | 0.6056 | 0.1009 | 1.021 |
|  | 12 | rs2393073 | 1.68E-06 | 0.7249 | 0.1036 | 1.176 |
|  | 12 | rs10859030 | 4.90E-06 | 1 | 0.2643 | 0.824 |
|  | 11 | rs545830 | 6.15E-06 | 1 | 0.2952 | 1.131 |
|  | 2 | rs3747517 | 6.85E-06 | 1 | 0.2958 | 1.016 |

*Chr*. , Chromosome. *Bonf*, Bonferroni corrected *P*-value. *FDR*, False discovery rate. *OR*, Odd ratios. Association results were corrected based on the number of SNPs (n = 431,962) tested.

**Table S2.**  The distribution of phenotypic attributes of 187 DS-CHD individuals and controls.

| **Country** | | **Number of Cases** | | **Number of Controls (DS without CHD)** | |
| --- | --- | --- | --- | --- | --- |
| France | Illumina 550K Illumina 610K Total  38 AVSD 21 17  39 ASD 17 22  45 VSD 22 23 | | Illumina 550K Illumina 610K Total  102 49 | |
| Italy | 9 AVSD 9  6 ASD 6  5 VSD 5 | |  | |
| Spain | 15 AVSD 15  2 ASD 2  12 VSD 12 | |  | |
| Greece | 7 AVSD 7  4 ASD 4  5 VSD 5 | |  | |
| **Total** | 96 91  **187** | | 102 49 **151** | |

**Table S3.**  *P*-values of top pairs of potentially interacting SNPs from the 431,962 whole genome SNPs for the DS-CHD phenotype and its different sub-phenotypes.

| **Phenotype** | **SNP1_Chr.** | **SNP location** | ***cis*-eQTL** | **SNP2_Chr.** | **SNP location** | ***cis*-eQTL** | ***P*-value** |
| --- | --- | --- | --- | --- | --- | --- | --- |
| **CHD** | rs4246521_1 | *ZNF364* | *ANKRD35/PDE4DIP* | rs2899668_15 | Intergenic | *FAM148B/VPS13C* | 1.45×10-11 |
|  | rs1680662_1 | *ZNF364* | *ANKRD35/PDE4DIP* | rs2899668_15 | Intergenic | *FAM148B/VPS13C* | 2.30×10-11 |
|  | rs8004209_14 | *TMEM63C* |  | rs1178778_3 | Intergenic | *ROBO1* | 5.23×10-11 |
|  | rs2966122_16 | *CMIP* | *CMC2* | rs9991795_4 | *RNF150* | *IL15* | 7.90×10-11 |
| **AVSD** |  |  |  |  |  |  |  |
|  | rs7764005_6 | Close to *THBS2* |  | rs12043436_1 | *DAB1* | *OMA1* | 2.38×10-11 |
|  | rs11628040_14 | *LINC00520* |  | rs9898755_17 | Intergenic |  | 7.98×10-11 |
|  | rs7764005_6 | Close to *THBS2* |  | rs552496_1 | Close to *DAB1* |  | 9.74×10-11 |
|  | rs2393638_10 | *ANK3* | *ANK3* | rs4781070_16 | *RMI2* | *RUNDC2A/RPM2* | 1.36×10-10 |
| **VSD** |  |  |  |  |  |  |  |
|  | rs7597939_2 | *BC042073* |  | rs6918808_6 | Intergenic |  | 3.68×10-11 |
|  | rs1379127_4 | Intergenic | *PCDH7* | rs12351801_9 | *TBC1D2* | *HEMGN* | 4.65×10-11 |
|  | rs2899668_15 | Intergenic | *FAM148B/VPS13C* | rs4246521_1 | *ZNF364* | *ANKRD35/PDE4DIP* | 7.99×10-11 |
|  | rs2899668_15 | Intergenic | *FAM148B/VPS13C* | rs1680662_1 | *ZNF364* | *ANKRD35/PDE4DIP* | 9.10×10-11 |
| **ASD** |  |  |  |  |  |  |  |
|  | rs7724739_5 | *ADAMTS12* | *AMACR* | rs6940651_6 | *SYNE1* |  | 8.03×10-11 |
|  | rs10121424_9 | *ZNF618* |  | rs6444462_3 | Intergenic |  | 8.46×10-11 |
|  | rs12971916_19 | *ZNF321* |  | rs2497750_1 | *PAP2D* | *AGL* | 1.16×10-08 |

The *cis*-eQTLs column shows if any of these interacting SNPs have also *cis*-eQTL effects on gene expression. The threshold for being *cis-*eQTL is set to *p* < 0.01 (see Yang et al. 2010).

**Table S4.** The list of primers used for qPCR .

| **Primer** | **Sequence** |
| --- | --- |
| CNV0-F | 5´-TGGTAGTCAGTTCAGGACAAATG-3´ |
| CNV0-R | 5´-TACCCACTTCAGAGGTGCAA-3´ |
| CNV1-F | 5´-CTCTCAGAGGGTTCATGCTG-3´ |
| CNV1-R | 5´-CAGCCTCCATAAGACCCTTG-3´ |
| CNV2-F | 5´-ACAGAAGCTCCTGGTGACG-3´ |
| CNV2-R | 5´-TCCAAGCAACTGAAAATCCA-3´ |
| CNV3-F | 5´-CTCAAACACGGTAATGTGTGC-3´ |
| CNV3-R | 5´-CCCCTTTAGGAAATGTCTGC-3´ |

**Table S5.** The list of primers for genotyping rs1943950 and rs681418 by Sanger sequencing.

| **Primer** | **Sequence** |
| --- | --- |
| rs1943950_R | 5´-CTCTACCTCTTTTCCTGGGTAAA-3´ |
| rs681418_F | 5´-AGGCTGTGTGGAATCAGCATTAT-3´ |

**Table S6.** The list of primers used in PCR amplification and pyrosequencing genotyping of rs2832616, rs2183593, rs7282991 and rs9723772.

| **Primer** | **Function** | **Sequence** |
| --- | --- | --- |
| rs2832616_F | Fwd PCR | 5´-CTTCAACTTGGGTGGTTCTTTCT-3´ |
| rs2832616_R | Rev PCR | 5´-biotin-AGGGGCACATCATTCTGGA-3´ |
| rs2832616_S | Sequencing | 5´-GGGTGGTTCTTTCTCTAC-3´ |
| rs2183593_F | Fwd PCR | 5´-AGTCCATAACCCACGGCAATT-3´ |
| rs2183593_R | Rev PCR | 5´-biotin-CCCATCATGCTTCTCCTGTCAA-3´ |
| rs2183593_S | Sequencing | 5´-TCTTCAAGAGTGTGCAG-3´ |
| rs7282991_F | Fwd PCR | 5´-AGAGCTGGGTGGCTGGTGA-3´ |
| rs7282991_R | Rev PCR | 5´-biotin-GCCCCAGGGACACACAAG-3´ |
| rs7282991_S | Sequencing | 5´-GACGCTGGGCCAGCT-3´ |
| rs972372_F | Fwd PCR | 5´-biotin-GCGAGTTTAATTCCTCATACGTG-3´ |
| rs972372_R | Rev PCR | 5´-CAAGAACTTCTGCGGTCATGT-3´ |
| rs972372_S | Sequencing | 5´-GCTACAGTGGAGAACTATTC-3´ |

**Table S7.** DAVID GO term analyses for GWIS top signals.

| **GO TERM** | ***P*** | **Fold Enrichment** | **FDR*-BH*** |
| --- | --- | --- | --- |
| Cell adhesion | 0.0177 | 3.74 | 0.99 |
| Biological adhesion | 0.0178 | 3.73 | 0.98 |
| Cell-cell adhesion | 0.0227 | 6.32 | 0.96 |
| Negative regulation of cell proliferation | 0.0449 | 4.83 | 0.99 |

*P,* nominal *P-*value*.* FDR*-BH,* False discovery rate control by the *BH* procedure*.*
